# Supplementary material
Source: PubMed Central journal article supplement (PMC9006907)
Supplement: jvi.00162-22-s0001.pdf [file jvi.00162-22-s0001.pdf]

# Epigenetic Landscape of HIV-1 Infection in Primary Human Macrophage

Fang Lu<sup>1</sup>, Urvi Zankharia<sup>2</sup>, Olga Vladimirova<sup>1</sup>, Yanjie Yi<sup>2</sup>, Ronald G. Collman<sup>2,\*</sup>, and Paul M. Lieberman<sup>1,\*</sup>

## Supplemental Information

### Supplemental Figure S1

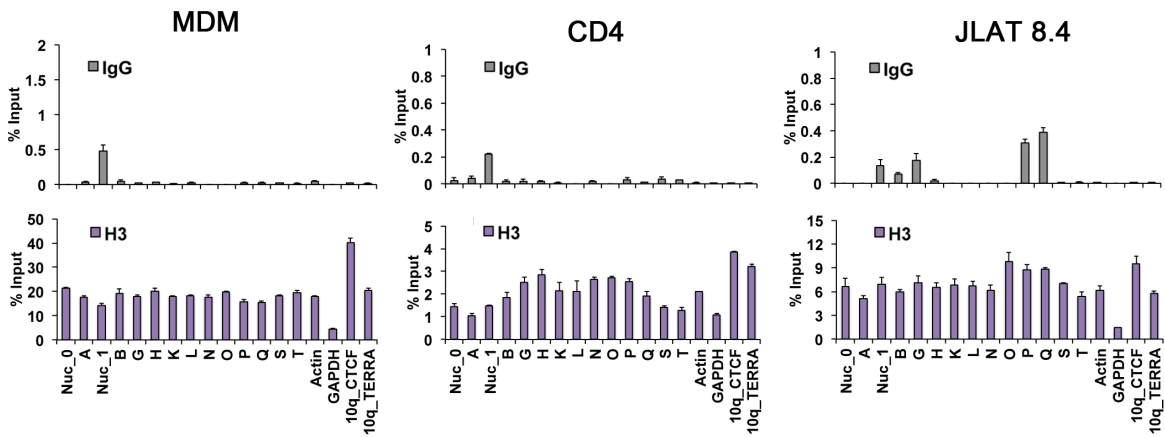

**Supplemental Figure S1. ChIP-qPCR controls.** ChIP-qPCR of HIV genome (as in Figure 1) showing control IgG and total H3 antibody in MDM, CD4, and JLAT 8.4.

**Supplemental Table S1 – Gag, 2-LTR circle and cellular B-globin quantification primers**

|                                                                       |                |
|-----------------------------------------------------------------------|----------------|
| CATGTTTTTCAGCATTATCAGAAGGA                                            | GAG 6F         |
| TGCTTGATGTCCCCCACT                                                    | GAG 84R        |
| 5'-(FAM)-CCACCCACAAGATTTAAACACCATGCTAA-(BHQ1)-3'                      | GAG probe      |
| AGCTAGGAAACCCACTGCTTAAG                                               | YU2-2LTR-F     |
| CCCACAGATCAAGGATATCTTGTC                                              | YU2-2LTR-R     |
| 5'-(FAM)-CCACCCACAAGATTTAAACACCATGCTAA-(BHQ1)-3'                      | YU2-2LTR probe |
| CCCTTGGACCCAGAGGTTCT                                                  | BGlob-F        |
| CGAGCACTTTCTTGCCATGA                                                  | BGlob-R        |
| 5'-(FAM)-<br>GCGAGCATCTGTCCACTCCTGATGCTGTTATGGGCGCTCGC-<br>(TAMRA)-3' | BGlob probe    |

**Supplemental Table S2 HIV genomic primers.**

**A. Genomic primers for HIV YU2 strain.**

|                               |          |
|-------------------------------|----------|
| CACTGACCTTTGGATGGTGCTT        | Nuc_0_5' |
| TGCATTGGCCTCTTCTATCTTCT       | Nuc_0_3' |
| AGAAGGGTTAGAGTGGAGGTTTGA      | A_5'     |
| TCTCGGGCCACGTGATG             | A_3'     |
| ATCTGAGCCTGGGAGCTCTCT         | Nuc_1_5' |
| AGGCAAGCTTTATTGAGGCTTAAG      | Nuc_1_3' |
| CGACTGGTGAGTACGCCAAA          | B_5'     |
| CGCACCCATCTCTCTCCTTCT         | B_3'     |
| CAGCCAGGTCAGCCAAAATT          | C_5'     |
| TGGCCTGATGTACCATTTGC          | C_3'     |
| GAGCAAGCTTCACAGGAGGTAAA       | D_5'     |
| TCTGGGTTTCGCATTTTGA           | D_3'     |
| GCCAACAGCCCCATCAGA            | E_5'     |
| CTGAGAGGGAGTTGTTGTCTCTTCT     | E_3'     |
| GGATGGCCCAAAGTTAAACAA         | F_5'     |
| TTTTCAGGCCCAATTTTTGAA         | F_3'     |
| CTTAGAAATAGGGCAGCATAGAACAA    | G_5'     |
| GGTAAATCCCCACCTCAACAGA        | G_3'     |
| AAAACAGGGAAATTCTAAAAGAACCA    | H_5'     |
| TTCTGTATTTCTGCTATCAAGTCTTTTGA | H_3'     |
| TCTCCCTAACTGACACAACAAATCA     | I_5'     |
| CCGAATCCTGCAAAGCTAGATAA       | I_3'     |
| GCAGAAGTTATTCCAGCAGAGACA      | J_5'     |
| GGCCATCTTCCTGCTAATTTTAAG      | J_3'     |
| AACAGATGGCAGGTGATGATTG        | K_5'     |
| TTTACTAACTTTTCCATGCTCTAATCCT  | K_3'     |
| GCACAATGAATGGACACTAGAGCTT     | L_5'     |
| CATGGCCTAGGAAAATGTCTAACA      | L_3'     |
| GCAGAAGACAGTGGCAATGAGA        | M_5'     |
| CCTTTTCCACAAGTGCTGATAAT       | M_3'     |
| ATGGTAGAACAAATGCATGAGGATAT    | N_5'     |
| GGAGTTAATTTTACACATGGCTTTAGG   | N_3'     |
| GGCAGTCTAGCAGAAGAAGAGATAGTAA  | O_5'     |
| CTTGTATTGTTGTTGGGTCTTGTAACA   | O_3'     |
| CCCATCAGAGGACAAATTAGATGTT     | P_5'     |
| CGTGTCCTTACCACCATCTCTTG       | P_3'     |
| GCACCACTACTGTGCCTTGGA         | Q_5'     |
| TCATGTTATCCCAAATTTCAATTCAG    | Q_3'     |

|                            |      |
|----------------------------|------|
| TGGATGGCTTCTTAGCAATTATCTG  | R_5' |
| AGCGGTGGTAGCTGAAAAGG       | R_3' |
| GGGACTGGAAGGGCTAATTCA      | S_5' |
| TGGTAGACCCACAGATCAAGGA     | S_3' |
| GCATCCGGAGTACTACAAGAACTGAT | T_5' |
| CCACGCTTCCCTGGAAAGT        | T_3' |

**B. Genomic primers for HIV HXB2 strain (JLAT 8.4).**

|                                |          |
|--------------------------------|----------|
| CCAGGGCCAGGGATCAG              | Nuc_0_5' |
| GCTCAACTGGTACTAGCTTGTAGCA      | Nuc_0_3' |
| AGAAGTGTTAGAGTGGAGGTTTGACA     | A_5'     |
| AGCTCTCGGGCCATGTGA             | A_3'     |
| ATCTGAGCCTGGGAGCTCTCT          | Nuc_1_5' |
| AGGCAAGCTTTATTGAGGCTTAAG       | Nuc_1_3' |
| CGACTGGTGAGTACGCCAAA           | B_5'     |
| CGCACCCATCTCTCTCCTTCT          | B_3'     |
| TGGGTAAAAGTAGTAGAAGAGAAGGCTTT  | C_5'     |
| GGCTCCTTCTGATAATGCTGAAA        | C_3'     |
| GAGCAAGCTTCACAGGAGGTAAA        | D_5'     |
| TCTGGGTTTCGCATTTTGG            | D_3'     |
| CAGGAGCCGATAGACAAGGAA          | E_5'     |
| GGGTCGTTGCCAAAGAGTGA           | E_3'     |
| GGCCTGAAAATCCATACAATACT        | F_5'     |
| CCAGAAGTCTTGAGTTCTCTTATTAAGTTC | F_3'     |
| GGGACTTACCACACCAGACAAAA        | G_5'     |
| GAGTTCATAACCCATCCAAAGGA        | G_3'     |
| GAAAACAGGAAAATATGCAAGAATGA     | H_5'     |
| TGCACTGCCTCTGTTAATTGTTTTA      | H_3'     |
| CAAGCACAACCAGATCAAAGTGA        | I_5'     |
| GCCAGATAGACCTTTTCCCTTTTTTATT   | I_3'     |
| GCAGGAAGATGGCCAGTAAAAA         | J_5'     |
| CCGTAGCACCGGTGAAATTG           | J_3'     |
| GCAAGTAGACAGGATGAGGATTAGAA     | K_5'     |
| CCCCTAGCTTCCCTGAAACA           | K_3'     |
| ATTTTCCTAGGATTTGGCTCCAT        | L_5'     |
| GCCCAAGTATCCCATAAGTTTC         | L_3'     |
| AAGACAGTGGCAATGAGAGTGAAG       | M_5'     |
| CATCAACATCCCAAGGAGCAT          | M_3'     |
| GGTAAGGTGCAGAAAGAATATGCA       | N_5'     |
| TGGGAATTGGCTCAAAGGAT           | N_3'     |

|                                |      |
|--------------------------------|------|
| CAGGGAGAGCATTGTTACAATAGG       | O_5' |
| TGTTCTCTTAATTTGCTAGCTATCTGTTTT | O_3' |
| CAGACCTGGAGGAGGAGATATGA        | P_5' |
| GGTGCTACTCCTAATGGTTCAATTTT     | P_3' |
| GGAGTGGGACAGAGAAATTAACAATT     | Q_5' |
| GCTGGTTTTGCGATTCTTCAA          | Q_3' |
| GGGTGGGAAGCCCTCAAAT            | R_5' |
| GCACTATTCTTTAGTTCCTGACTCCAA    | R_3' |
| GGGCTAATCACTCCCAAAGAA          | S_5' |
| GGAAGTAGCCTTGTGTGTGGTAGA       | S_3' |
| TGCATCCGGAGTACTTCAAGAA         | T_5' |
| CACGCCTCCCTGGAAAGTC            | T_3' |

**Supplemental Table S3 RT-qPCR primers.**

|                                |                    |
|--------------------------------|--------------------|
| CCTAGTATAACAATGAGACACCAGGG     | AS_RT_1 (2944)     |
| CACTCCCAACAAAGACAAGATA         | AS_RT_2 (15)       |
| CTCCCATGTAGAATAAAACAAATTA      | AS_RT_3 (7431)     |
| TGAGACAACATCTGTTGAGGTGGG       | YU2_3161_PRIMER1_F |
| GGCTGTACTGTCCATTTATCAGGA       | YU2_3275_PRIMER1_R |
| TTGTTCTGCTGTTGCACTA            | YU2_7846_PRIMER2_F |
| AGCTTTGTTCTTGGGTTCT            | YU2_7733_PRIMER2_R |
| CTTCCGCTGGGGACTTTCCAGG         | YU2_351_PRIMER3_F  |
| CCAGAGAGACCCAGTACAGGCCAAAAGCAG | YU2_461_PRIMER3_R  |
| GTTTCAGACCCACCTCCCAG           | YU2_8333_PRIMER4_F |
| TGGACCGGATCTGTCTCTGT           | YU2_8426_PRIMER4_R |
| CGGCGACTGAATTGGGTG             | TAT_F              |
| CGGCGACTGGAAGAAGCG             | NEF_F              |
| GTCTCTCTCTCCACCTTCTTCTTC       | TAT_NEF_R          |
| CGCCCTGCCTATCTGTATTC           | GUSB_F             |
| TCCCCACAGGGAGTGTGTAG           | GUSB_R             |
